# Supplementary material for: Simultaneous Determination of the Traditional Herbal Formula Ukgansan and the In Vitro Antioxidant Activity of Ferulic Acid as an Active Compound
Source: PubMed Central journal article supplement (PMC6100485; doi:10.3390/molecules23071659), 2018-07-07

**Supplementary figure 1.** Calibration curves, LODs and LOQs of seven marker compounds in UGS. The regression equations are presented as the mean of triplicate experiments. LODs and LOQs are calculated by  $3.3 \times$  (SD of the response/slope of the calibration curve) and  $10 \times$  (SD of the response/slope of the calibration curve), respectively.

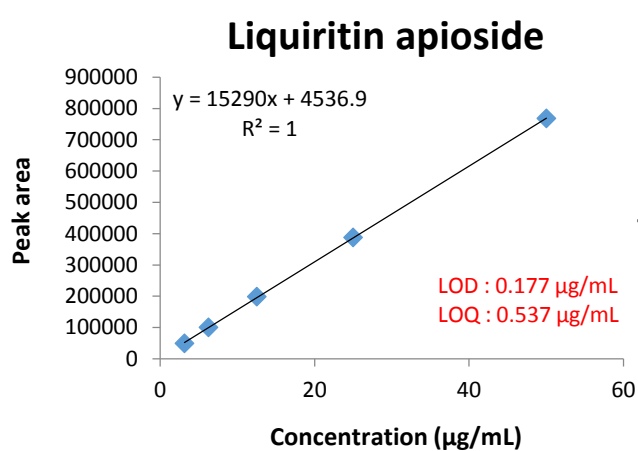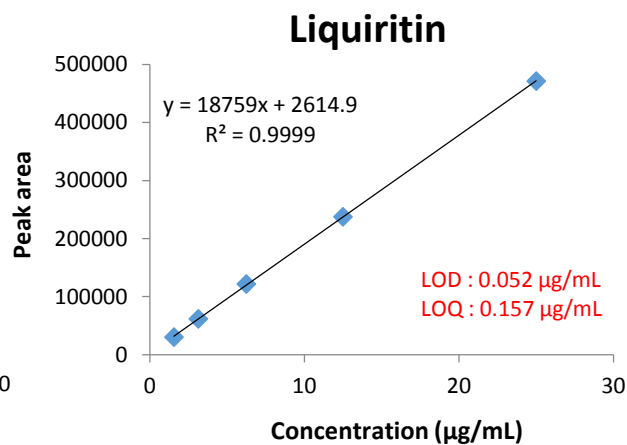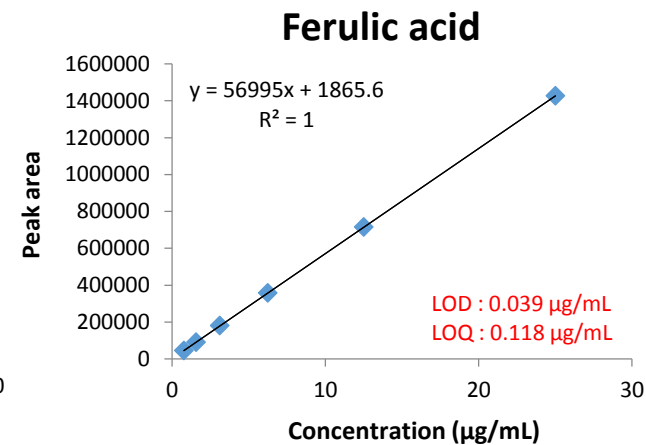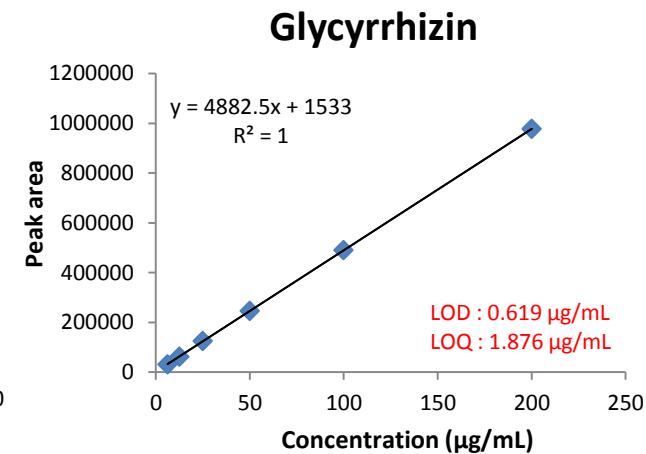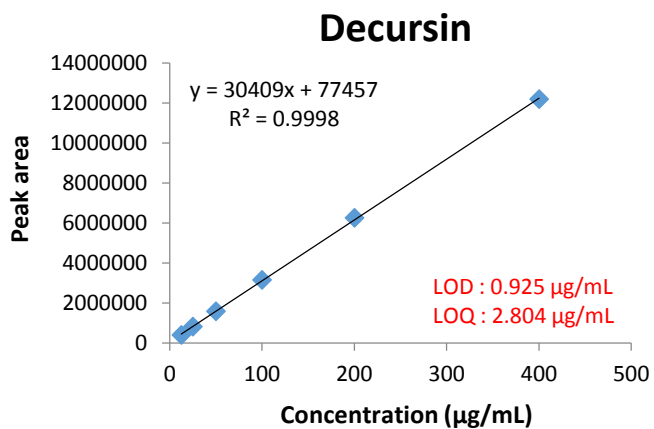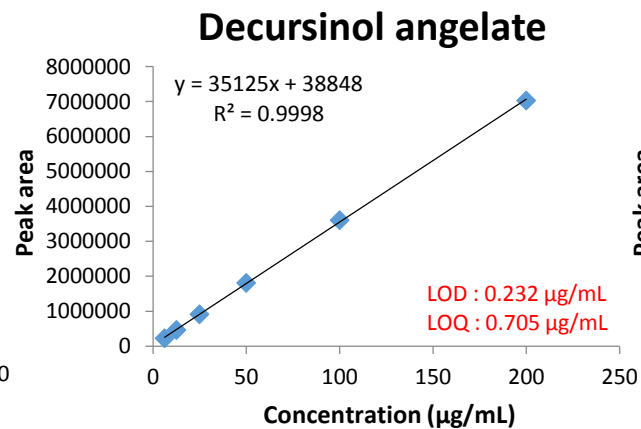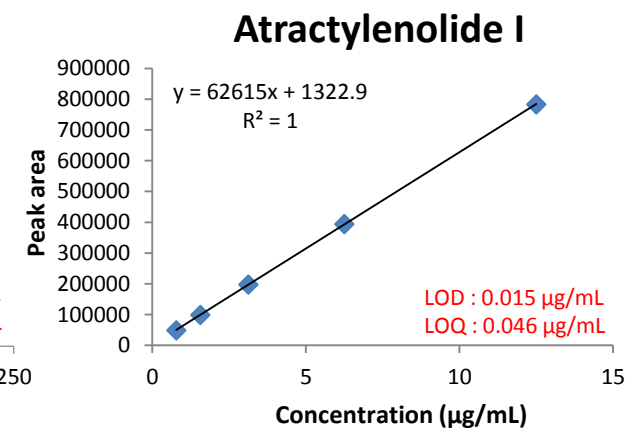

Supplement: molecules-23-01659-s001.pdf [file molecules-23-01659-s001.pdf]
